# Supplementary material
Source: PubMed Central journal article supplement (PMC7719611)
Supplement: NIHMS1602664-supplement-supp_info.pdf [file NIHMS1602664-supplement-supp_info.pdf]

### Supporting Figure S1

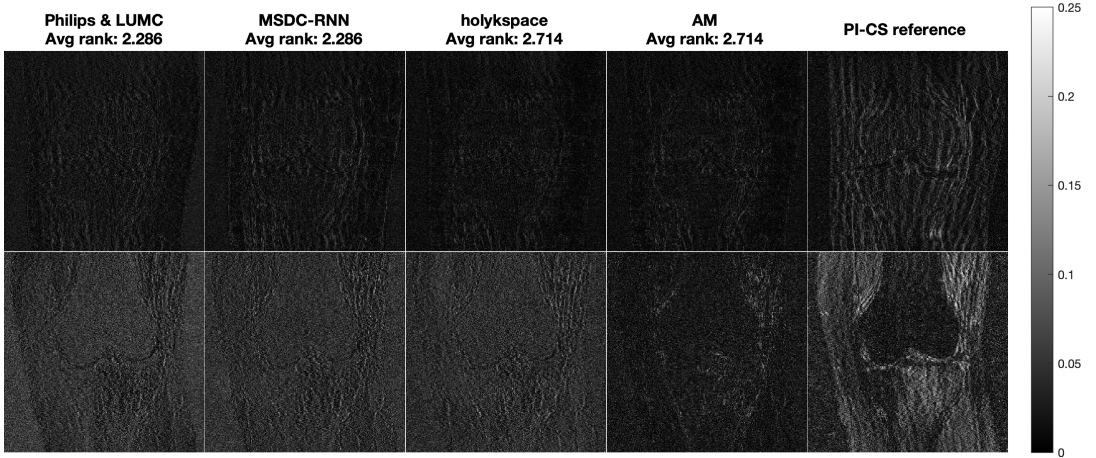

**SUPPORTING FIGURE S1** Difference images to the ground truth for the multi-Coil R=4 track results corresponding to Figure 2 from the main body. The difference images are normalized with respect to the maximum signal value of the ground truth and plotted between the range of 0 and 0.25. The top 4 submissions are ordered from left to right based on the average of the radiologists' rankings.

## Supporting Figure S2

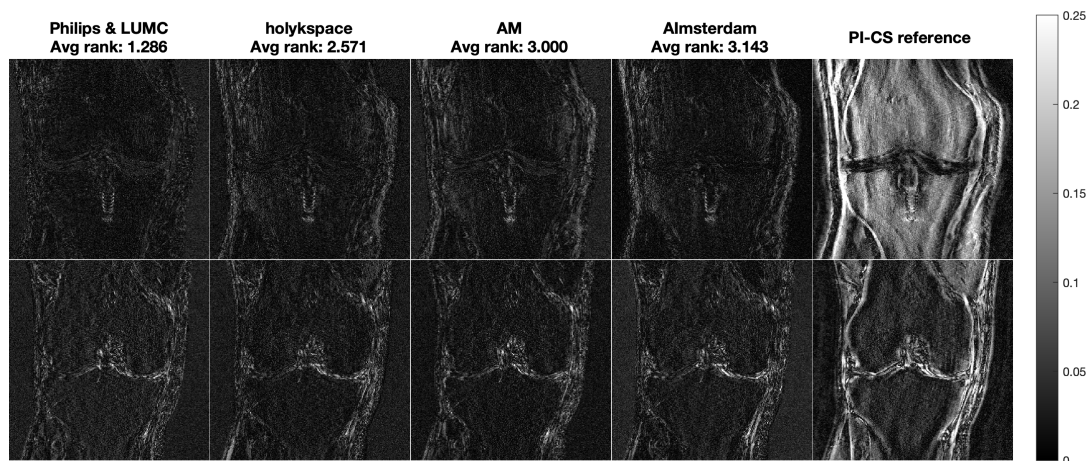

**SUPPORTING FIGURE S2** Difference images for the multi-Coil R=8 track results corresponding to Figure 3 from the main body. The difference images are normalized with respect to the maximum signal value of the ground truth and plotted between the range of 0 and 0.25. The top 4 submissions are ordered from left to right based on the average of the radiologists' rankings.

### Supporting Figure S3

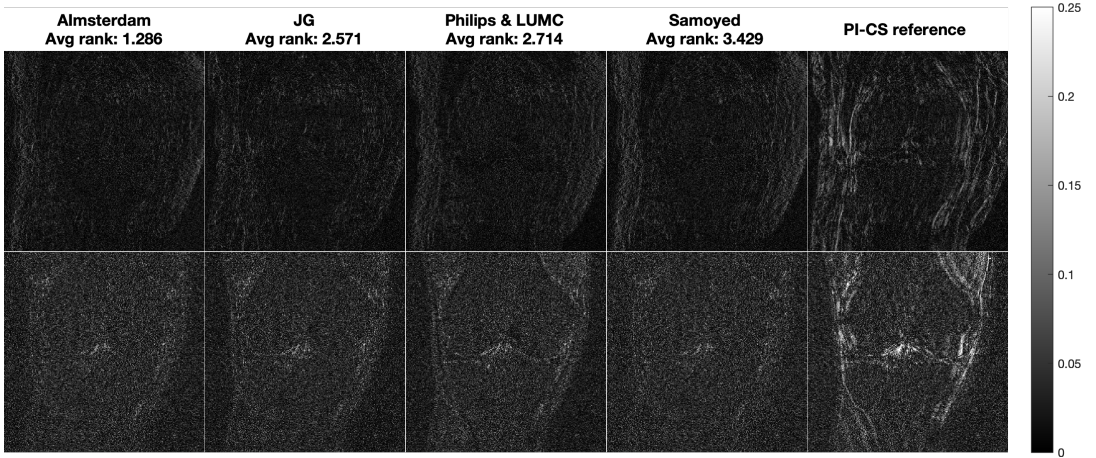

**SUPPORTING FIGURE S3** Difference images for the single-Coil R=4 track results corresponding to Figure 4 from the main body. The difference images are normalized with respect to the maximum signal value of the ground truth and plotted between the range of 0 and 0.25. The top 4 submissions are ordered from left to right based on the average of the radiologists' rankings.

## Supporting Figure S4

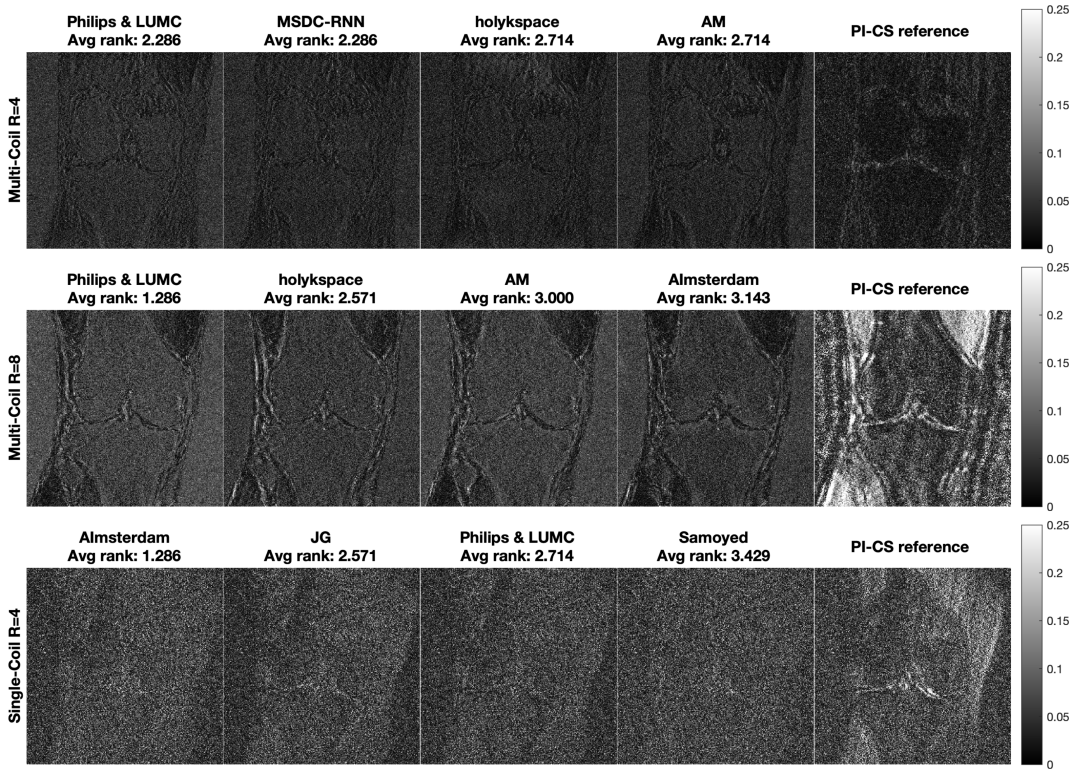

**SUPPORTING FIGURE S4** Difference images for the cases with the lowest averaged SSIM over the whole image volume from the top4 submissions for each track, corresponding to the results from Figure 5 in the main body. The difference images are normalized with respect to the maximum signal value of the ground truth and plotted between the range of 0 and 0.25. The top 4 submissions are ordered from left to right based on the average of the radiologists' rankings.
